# Supplementary material for: Reablement – relevant factors for implementation: an exploratory sequential mixed-methods study design
Source: BMC Health Serv Res. 2022 Jul 28;22:959. doi: 10.1186/s12913-022-08355-x (PMC9336056; doi:10.1186/s12913-022-08355-x)
Supplement: Supplementary file 2 — Additional file 2. [file 12913_2022_8355_MOESM2_ESM.xls]

## Sheet: survey_raw data
id	Completed	Last page seen	Start language	Token	A1	OS [OS01]	OS [OS02]	OS [OS03]	OS [OS04]	OS [OS05]	OS [OS06]	OS [OS07]	OS [OS08]	OSC	IS [IS01]	IS [IS02]	IS [IS03]	IS [IS04]	IS [IS05]	ISC	IC [IC01]	IC [IC02]	IC [IC03]	IC [IC04]	IC [IC05]	IC [IC06]	IC [IC07]	IC [IC08]	IC [IC09]	IC [IC10]	IC [IC11]	IC [IC12]	IC [IC13]	IC [IC14]	ICC	CI [CI01]	CI [CI02]	CI [CI03]	CI [CI04]	CI [CI05]	CI [CI06]	CIC	P [P01]	P [P02]	P [P03]	P [P04]	P [P05]	P [P06]	P [P07]
7	2019-11-29 17:53:28	7	en		Yes	4	4	1	1	1	5	2	5	Clinicians often assume there will be resistance to a new model. But in our experience, if the clinician "set the table" properly, is confident and listens carefully to pt. things move along.	5	4	5	4	5			5	5	5	5	5	4	5	5	1	2	4	2	2	In the US, a nurse would be the team anchor to assure that medical issues are under control in tandem with rehab goals. We found very little need for MD input other than when meds needed adjusting.	5	5	5	5	4	1	We only worked w/ experienced home care staff, and created an environment where they (at every level) shared observations and suggestions. Experienced aides often get insights that professionals miss.	5	5	5	5	5	5	5
8	2019-11-30 12:28:06	7	en		Yes	5		4	1	4	5	4	4		5	4	4	5	5		5	5	5		5	5	5				5	5	2	5		5	5	5	5	5	4				4	5	2	3
9	2019-12-02 07:49:05	7	en		Yes	5	2	4	4	4	4	5	4		5	3	5	5	5		4	3	4	3	4	5	4	5	5	4	4	5	3	4		5	5	5	5	5	3	All very well talking about not being focused on time and tasks but someone needs to pay the bills and this is where it becomes difficult	3	4	5	5	3	3	3
10	2019-12-02 11:55:33	7	en		Yes	5
11	2019-12-02 13:52:19	7	en		Yes	3	2	3	5	5	5	5	3		5	3	5	5	5		5	5	5	4	5	5	5	5	5	2	2	5	5	5		5	5	5	5	5	4		3	3	5	5	5	5	5
12	2019-12-02 16:53:05	7	en		Yes	5	4	2	3	5	4	4	5		5	2	5	5	4		4	4	5	2	5	5	5	2	2	1	5	5	1	2	The vast majority of services in England have no clinical staff because they are operated / funded by local authorities. OTs may be accessed by participants where necessary and appropriate. They are not clinically driven and so medical staff in the team not required. We use support plans NOT care plans - the latter arise in health orientated services - hence reablement and NOT restorative care wh…	5	5	5	5	4	5	This section uses terms like care worker - this sets a model of care rather than support. Hence, most reablement staff are not called careworkers across England. This is not a simple matter of titles but reflects the difference in approach and mindset	3	5	3	5	5	5	5
13		3	en		Yes	3	3	2	3	3	4	4	4			2	4	4	4
14	2019-12-03 22:00:00	7	en		Yes	4	4		5	5	4	5	2		5	2	4	4	4		4	5	5	5	5	5	3	2	4	1	1	4	1	3		5	4	5	5	4	2		3	4	5	3	3	5	3
15	2019-12-04 02:04:57	7	en		Yes	1	3	5	5	5	5	3	5	In regard to q1 in Australia we are still trying to sell the idea of reablement as part of the pathway into(hopefully then avoiding) aged care to the commonwealth and we use this as an argument	5	5	5	5	5		5	5	5	1	5	5	5	1	3	1	4	5	5	5	in relation to team when you say core I assume you mean that this person interacts with the client whereas I beleive you need a MDT to provide ongoing mentoring, support and availability of specialist referral to a well trained non health professional reablement team	5	5	5	5	5	5		1	3	1	5	5	5	3
16	2019-12-04 13:18:51	7	en		Yes	5	3	5	2	5	4	4	3	Q.2 Peer Pressure – This question is a bit difficult to answer because it is context driven. Perhaps Home Care from a translation (German to English) point of view is meant to mean here ‘other community rehabilitation services?’ Home Care services on the other hand (those which provide ‘hands on’ care) are disparate across the UK. Some are ‘state’ owned, and others are privately owned. Some have …	4	3	5	5	5	Q. 1 Commitment to philosophy/Concept – I would say rather relevant than an absolute. Reablement services often start with doubt – not only from the service providers themselves but also in terms of getting ‘buy in’ from other associated agencies within the organisation. Once reablement services start to deliver outcomes and cost savings – others within the associated organisation can then clearl…	5	5	5	5	5	5	4	5	5	1	5	5	5	5	Q. 6 Evaluation on basis of outcome – Absolutley necessary. The individual must be given time (within realistic limitations) to gain confidence and skill in re-learning; adapting and/or using new devices or technology to meet their own personal objectives (goals). They are best able to state whether they have regained confidence or not. The OT or PT will make their own judgement on this if there …	5	5	5	5	5	4		4	5	5	5	5	5	5
17	2019-12-04 13:46:31	7	en		Yes	5	2	4	1	5	4	5	3		5	3	5	5	3		4	5	5	5	5	5	5	5	5	5	4	5	3	5		5	5	5	5	5	4		5	5	4	5	5	3	4
18	2019-12-06 20:32:53	7	en		Yes	3	1	4	1	4	4	4	3		4	3	5	5	4		5	5	5	5	4	5	3	1	2	1	3	4	2	5		5	5	5	5	5	1		4	4	5	5	4	4	3
19	2019-12-16 11:28:15	7	en		Yes	5	3	3	3	3	5	3	3		4	5	5	4	5	answered these questions from the point of view of a researcher	5	5	5	5	5	5	1	5	5	4	5	5	1	5		5	5	5	5	4	5	as a researcher, my experience is that reablement is easier for the younger professionals as they are more familiar with the framework of health promotion. however, you can teach and old dog new tricks, given time and encouragement	5	1	5	3	5	5	3
20	2019-12-16 18:35:23	7	en		Yes	2	2	4	1	4	5	4	3		5	5	5	5	5		5	5	5	5	5	5	5	3	5	2	4	5	4	5		5	5	5	5	5	5		4	5	5	5	4	5	5
21		1	en		Yes
22		1	en		Yes
23		1	en		Yes
24		1	en		Yes
25		2	en		Yes	3	4	1	1	1	1	1	1
26		1	en		Yes
28	2020-01-15 07:52:07	7	en		No
29	2020-01-15 08:04:16	7	en		Yes	4	4	3	2	2	4	2	4		3	4	4	4	5		5	4	4	3	4	4	4	4	4	3	4	4	1	4		4	5	5	4	4	2		4	3	5	5	3	4	3
30		1	en		Yes
31	2020-01-19 22:44:38	7	en		Yes	5	4	1	3	5	3	5	3	rating of this questionnaire is problematic in that 'moderately' and 'rather' are not clear to me.	5	4	5	5	5		3	5	5	5	5	4	3	3	5	3	5	5	1	2	registered nurses should be part of the core team in older people - reablement must be considered in the context of chronic disease management. Face-to-face contact highly encouraged.	5	5	5	5	3	3		3	5	4	5	5	5	5
32		1	en		Yes
33	2020-01-24 07:28:02	7	en		Yes	4	3	3	4	4	4	4	3		4	4	5	4	4		4	5	5	4	4	4	5	5	5	4	4	5	4	3		5	5	5	5	5	4		4	4	4	4	5	4	5
34			en		N/A
35	2020-01-28 12:24:24	7	en		Yes
36	2020-01-29 17:40:25	7	en		Yes	5	2	4	4	5	5	5	2	The client must have some way to communicate with Reablement team. The local language isn't necessery if there is enough interpreter services which can be used by Reablement team. The aphasia isn't problem at all if team knows how to communicate with client.	5	5	5	5	5		5	5	5	4	5	5	5	5	5	5	5	5	1	5		5	5	5	5	5	2		4	5	5	5		5	5
[truncated: 30 more columns]

## Sheet: legend
Code	Factor
IC 01	Social issues, the need of "being" and "belonging" in the community are addressed; Reablement may take place in the wider community, not only in people´s homes.
IC 02	Social environment (family, friends, neighbours) is included in the Reablement-team.
IC 03	Client´s own goals serve as a common interdisciplinary platform; there is an agreement on the process for reaching these goals with the client, family and informal carers.
IC 04	Care professional and therapist together carry out initial goal setting interview with clients.
IC 05	Common, thorough and consistent assessments and documentation; e.g. development and implementation of a unified treatment-plan
IC 06	Evaluation on the basis of outcome and goal attainment instead of evaluation on time and tasks
IC 07	Care workers are exclusively employed in Reablement, so they don´t have to switch between Reablement and traditional home care.
IC 08	Physiotherapists are part of the core team.
IC 09	Occupational Therapists are part of the core team.
IC 10	Physicians (gerontologist) are part of the core team.
IC 11	Access to specialists` skills (e.g. dietician, substance abuse counsellor, mental health nurse, speech therapist...) is assured.
IC 12	Access to equipment (e.g. aids, assistive technology, home adaptation and telecare) is given.
IC 13	Face to face contact is minimised (use of phone calls and telecare instead) to avoid the chance that clients will become dependent on team members` visits and to ensure the program is as cost efficient as possible.
IC 14	Reablement service is cost-free for clients.
OS 01	Political pressure to develop cost-effective solutions in response to demographic developments.
OS 02	There is peer-pressure: other home care services are providing Reablement.
OS 03	A selective approach to the Reablement service is used (that means excluding people who are unlikely to benefit from Reablement).
OS 04	The client has few or no previous experiences with traditional homecare.
OS 05	The client has realistic expectations based on an understanding of the difference between traditional home care und Reablement.
OS 06	The client has capacity to consent and has rehabilitation potential (e.g. not requiring total assistance with care and not bedridden).
OS 07	The client has willpower and motivation to work with the Reablement team towards autonomy.
OS 08	The client has sufficient language skills to be able to communicate in the local language.
IS 01	There is a commitment to the philosophy and concept of Reablement as well as the value of occupation in the whole organisation.
IS 02	Within the Reablement-team everyone is more or less at the same hierarchical level.
IS 03	There is an agreement on the process for reaching client-centred goals within the Reablement-team.
IS 04	The service has the capacity to provide flexible and prompt interventions (e.g. flexible use of working hours, goal-orientated planning of visits in terms of duration and frequency, adjust intervention quickly in response to improvements in clients´ abilities).
IS 05	Subsequent services after Reablement are provided in a way that maintains any progress the client has made.
CI 01	Reablement team members share a strong vision of the service (shared understanding of the aims and objectives of Reablement, especially to prevent inappropriate referrals)
CI 02	Reablement team members have individual qualities and social skills to perform teamwork / multidisciplinary collaboration / learning from each other.
CI 03	Reablement team members use patterns of communication that encourage clients and their families to participate in all care decisions (that means promoting their sense of autonomy rather than exerting power or control over the client).
CI 04	Careworkers are trained on the principles of delivering a Reablement service (e.g. learning to “stand back”, principles of self-management, healthy aging...).
CI 05	Careworkers work on reaching the goals without focus on time and task and plan the duration of home visits individually.
CI 06	Staff has less experience in traditional home care and is able to adapt more easily to the Reablement approach.
P 01	Communities design their own individual model of Reablement (including the structure of the team).
P 02	Rehabilitation experts are included in the planning and implementation of Reablement.
P 03	Reablement initiatives should be individually tailored and flexible with opportunities for employees to be creative.
P 04	Start-up costs and training for home care workforce are planned and calculated.
P 05	Reablement pilot projects start with small teams of selected, motivated team-members.
P 06	Success stories of selected users are promoted within the team.
P 07	A high level of work satisfaction among the team is secured by planning and conducting appropriate measures.
abbreviations
c	comment
CI	Characteristics of Individuals
D	duration/experience
en	english
G	gender
IC	intervention characteristics
id	identity
IS	inner setting
n	nationality
OS	outer setting
P	process
Pr	profession
